# Supplementary material
Source: Royal Society of Chemistry journal article supplement (doi:10.1039/d6cc00986g)
Supplement: d6cc00986g1.pdf [file d6cc00986g1.pdf]

## Supplementary Information

### High-performance, Acid-durable Nonprecious Ternary Alloy Cathode via Zn Dealloying for Proton Exchange Membrane Water Electrolysis

Chan Hee Lee, †<sup>a</sup> Kyeong-Rim Yeo †<sup>a</sup> and Soo-Kil Kim \*<sup>a</sup>

<sup>a</sup> School of Integrative Engineering, Chung-Ang University, 84 Heukseok-ro, Dongjak-gu, Seoul 06974, Republic of Korea

† Contributed equally

\*Corresponding author.

E-mail addresses: sookilkim@cau.ac.kr

## **1. Materials and methods**

### **1.1 Catalyst preparation**

NiMoZn catalysts were prepared via electrodeposition. All electrodeposition experiments were conducted in a homemade Teflon cell utilizing a three-electrode system under ambient temperature and pressure. A saturated calomel electrode (SCE, CHI 150) and graphite rod served as the reference and counter electrodes, respectively. Carbon paper (Ballard, Avcarb MGL280) with an exposed geometric area of 1.43 cm<sup>2</sup> was used as the working electrode. The electrolyte solution was prepared by dissolving C<sub>6</sub>H<sub>5</sub>Na<sub>3</sub>O<sub>7</sub>·2H<sub>2</sub>O (7555-4405, Daejung), ZnCl<sub>2</sub>·4H<sub>2</sub>O (8597-4405, Daejung), Na<sub>2</sub>MoO<sub>4</sub>·2H<sub>2</sub>O (7598-4405, Daejung), and NiCl<sub>2</sub>·6H<sub>2</sub>O (14-01045, Wako) in 40 mL of deionized water (18.2 MΩ·cm), followed by stirring for 20 min. To remove dissolved oxygen, N<sub>2</sub> gas was bubbled through the electrolyte for 30 min before deposition. Electrodeposition was performed using a potentiostat (CS350, Wuhan CorrTest Instrument Corp., Ltd.) by applying a constant potential at  $-2 V_{SCE}$  for 30 min. Following electrodeposition, the catalyst-coated carbon paper was dried under N<sub>2</sub> flow. The pristine NiMoZn (P-NiMoZn) catalyst was subsequently subjected to an electrochemical dealloying process to obtain the dealloyed NiMoZn (D-NiMoZn) catalyst. Dealloying was performed by applying a constant potential of  $-0.45 V_{SCE}$  for 1 h in 0.5 M H<sub>2</sub>SO<sub>4</sub>. To enhance the durability of the dealloyed catalyst in acidic environments, a post-heat treatment was performed at 400 °C for 2 h in a 4% H<sub>2</sub>/Ar atmosphere, yielding the HD-NiMoZn catalyst.

### **1.2 Material characterization**

The surface morphology of the catalysts was characterized using field emission scanning electron microscopy (FE-SEM, Zeiss Sigma). The bulk composition of the electrodeposited catalysts was analyzed by energy dispersive X-ray spectroscopy (EDS, Noran System 7, Thermo Fisher). The bulk crystalline structure of the catalysts was evaluated using X-ray diffraction (XRD, NEW D8-Advance, Bruker-AXS) in the  $2\theta$  range of  $20^\circ$ – $80^\circ$  at a scan rate of  $1^\circ \text{ min}^{-1}$ . X-ray photoelectron spectroscopy (XPS, K-alpha+, Thermo Fisher Scientific) was performed to investigate the electronic structure, oxidation states, and surface composition of the catalysts. All binding energies obtained from XP spectra were calibrated with respect to the C 1s C–C peak at 284.8 eV.

### **1.3 Electrochemical characterization**

The hydrogen evolution reaction (HER) activity was evaluated through cyclic voltammetry conducted in the potential range of  $-0.23$  to  $0.07 \text{ V}_{\text{RHE}}$  at a scan rate of  $1 \text{ mV s}^{-1}$ . All HER polarization curves were corrected for  $iR$  drop using the ohmic resistance values obtained via electrochemical impedance spectroscopy (EIS). The electrochemical double-layer capacitance was determined through linear sweep voltammetry (LSV) conducted in the non-faradaic region of a  $1 \text{ M NaOH}$  electrolyte at scan rates ranging from  $10$  to  $100 \text{ mV s}^{-1}$ . The  $C_{\text{dl}}$  value was divided by the specific capacitance ( $C_s$ ) of  $40 \mu\text{F cm}^{-2}$  to obtain the roughness factor, and the HER current density was divided by the roughness factor to calculate the specific activity. Charge transfer resistance was analyzed via EIS at an overpotential of  $30 \text{ mV}$ , within a frequency range of  $10^5$  to  $10^2 \text{ Hz}$ , and an amplitude of  $5 \text{ mV}$ . Accelerated degradation tests (ADTs) were performed over  $5,000$  cycles between  $-0.2$  and  $0.05 \text{ V}_{\text{RHE}}$  at a scan rate of  $100 \text{ mV s}^{-1}$ .

The durability of the catalysts was further evaluated under galvanostatic conditions at a constant current density of  $-10 \text{ mA cm}^{-2}$  for 24 h. All electrochemical measurements were performed in a three-electrode system using 0.5 M  $\text{H}_2\text{SO}_4$  as the electrolyte.

#### **1.4 PEMWE performance measurements**

The membrane electrode assembly (MEA) was fabricated using the HD-NiMoZn/CP catalyst, which exhibited optimal HER activity and durability, as the cathode with an active area of  $1 \text{ cm}^2$ . The anode was prepared by spray coating a commercial iridium oxide catalyst (043396, Alfa Aesar) with a loading of  $2.0 \text{ mg cm}^{-2}$  onto a carbon paper substrate. A Nafion 212 membrane (DuPont™, thickness  $50.8 \text{ }\mu\text{m}$ ) was used as the proton exchange membrane without hot pressing. During PEMWE operation, the cell temperature was maintained at  $90 \text{ }^\circ\text{C}$ , whereas the anode line was maintained at  $95 \text{ }^\circ\text{C}$ , with deionized water supplied to the anode at a flow rate of  $15 \text{ mL min}^{-1}$ . PEMWE cell performance was evaluated after activation at  $2.2 \text{ V}_{\text{cell}}$  for 30 min, followed by a stepwise potential sweep from 2.2 to  $1.35 \text{ V}_{\text{cell}}$  in  $0.05 \text{ V}_{\text{cell}}$  increments, holding each step for 1 min. This protocol was repeated five times. The durability of the PEMWE cell was assessed at a constant current density of  $1 \text{ A cm}^{-2}$  for 50 h.

**Table S1.** Surface elemental compositions of P-Ni<sub>81.6</sub>Mo<sub>2.4</sub>Zn<sub>16.0</sub> and D-Ni<sub>85.9</sub>Mo<sub>3.3</sub>Zn<sub>10.8</sub> species after dealloying measured by EDS and XPS.

| <b>P-Ni<sub>81.6</sub>Mo<sub>2.4</sub>Zn<sub>16.0</sub></b> | <b>Ni</b> | <b>Mo</b> | <b>Zn</b> |
|-------------------------------------------------------------|-----------|-----------|-----------|
| EDS atomic %                                                | 81.6      | 2.4       | 16.0      |
| XPS atomic %                                                | 35.0      | 4.0       | 61.0      |
| <b>D-Ni<sub>85.9</sub>Mo<sub>3.3</sub>Zn<sub>10.8</sub></b> | <b>Ni</b> | <b>Mo</b> | <b>Zn</b> |
| EDS atomic %                                                | 85.9      | 3.3       | 10.8      |
| XPS atomic %                                                | 71.4      | 10.9      | 17.7      |

**Table S2.** Comparison of HER activity and PEMWE performance of HD-Ni<sub>86.7</sub>Mo<sub>3.2</sub>Zn<sub>10.1</sub> with commercial Pt/C. The Pt/C data used for comparison were taken from our group's previous publication.<sup>[1]</sup>

| Catalyst                                                       | Overpotential / mV<br>@ -10 mA cm <sup>-2</sup> | Overpotential / mV<br>@ -50 mA cm <sup>-2</sup> |
|----------------------------------------------------------------|-------------------------------------------------|-------------------------------------------------|
| HD-Ni <sub>86.7</sub> Mo <sub>3.2</sub> Zn <sub>10.1</sub> /CP | 15.7                                            | 28                                              |
| Pt/C                                                           | 5.5                                             | 27.5                                            |

  

| Membrane electrode assembly(MEA)                                     | Temperature / °C | Current density / A cm <sup>-2</sup><br>@ 2.0 V <sub>cell</sub> | Cell Voltage / V <sub>cell</sub><br>@ 1 A cm <sup>-2</sup> |
|----------------------------------------------------------------------|------------------|-----------------------------------------------------------------|------------------------------------------------------------|
| Cathode : HD-Ni <sub>86.7</sub> Mo <sub>3.2</sub> Zn <sub>10.1</sub> |                  |                                                                 |                                                            |
| Membrane : Nafion 212 (50.8 μm)                                      | 90               | 1.897                                                           | 1.819                                                      |
| Anode : Com. IrO <sub>x</sub> (2.0 mg cm <sup>-2</sup> )             |                  |                                                                 |                                                            |
| Cathode : Pt/C/CP (0.05 mg cm <sup>-2</sup> )                        |                  |                                                                 |                                                            |
| Membrane : Nafion 212 (50.8 μm)                                      | 90               | 2.052                                                           | 1.700                                                      |
| Anode : Com. IrO <sub>x</sub> (2.0 mg cm <sup>-2</sup> )             |                  |                                                                 |                                                            |

**Table S3.** HER activity and durability of HD-Ni<sub>86.7</sub>Mo<sub>3.2</sub>Zn<sub>10.1</sub> and previously reported nonprecious electrocatalysts and corresponding conditions in acidic electrolytes.

| Catalyst                                                   | Overpotential @ -10 mA cm <sup>-2</sup> | Tafel slope (mV dec <sup>-1</sup> ) | Substrate                               | Electrolyte                          | Durability                                                                      | Reference  |
|------------------------------------------------------------|-----------------------------------------|-------------------------------------|-----------------------------------------|--------------------------------------|---------------------------------------------------------------------------------|------------|
| HD-Ni <sub>86.7</sub> Mo <sub>3.2</sub> Zn <sub>10.1</sub> | 15.7                                    | 36                                  | Carbon paper                            | 0.5 M H <sub>2</sub> SO <sub>4</sub> | 0.05 to -0.2 V <sub>RHE</sub><br>@ 5k cycles<br>100 h @ -10 mA cm <sup>-2</sup> | This study |
| Cu <sub>44.4</sub> Ni <sub>46</sub> Mo <sub>9.6</sub>      | 18                                      | 27.7                                | Carbon paper                            | 0.5 M H <sub>2</sub> SO <sub>4</sub> | -0.2 to -0.5 V <sub>SCE</sub><br>@ 5k cycles<br>24 h @ -10 mA cm <sup>-2</sup>  | [2]        |
| Nb-WSe <sub>2</sub>                                        | 27                                      | 33.4                                | W mesh                                  | 0.5 M H <sub>2</sub> SO <sub>4</sub> | 100 h @ 1000 mA cm <sup>-2</sup>                                                | [3]        |
| FeP                                                        | 144                                     | 76                                  | Cu NW/CP                                | 0.5 M H <sub>2</sub> SO <sub>4</sub> | 100 h @ -100 mA cm <sup>-2</sup>                                                | [4]        |
| Mo <sub>3</sub> S <sub>13</sub> -NCNT                      | 188                                     | 40                                  | GC RDE (1000 rpm)                       | 0.5 M H <sub>2</sub> SO <sub>4</sub> | N/A                                                                             | [5]        |
| FeP/CP                                                     | 38                                      | 34.8                                | Carbon paper                            | 0.5 M H <sub>2</sub> SO <sub>4</sub> | 90 h @ -10 mA cm <sup>-2</sup>                                                  | [6]        |
| defect-rich 1 T-2 H MoS <sub>2</sub> NS/CFP                | 192                                     | 44                                  | CFP                                     | 0.5 M H <sub>2</sub> SO <sub>4</sub> | 38 h @ -10 mA cm <sup>-2</sup>                                                  | [7]        |
| WO <sub>2.9</sub> /CP                                      | 169                                     | 48                                  | Carbon paper                            | 0.5 M H <sub>2</sub> SO <sub>4</sub> | 0 to -0.2 V <sub>RHE</sub> @<br>1k cycles<br>10 h @ -10 mA cm <sup>-2</sup>     | [8]        |
| 10%Mn-MoS <sub>2</sub> /CP                                 | 148                                     | 55                                  | Carbon paper                            | 0.5 M H <sub>2</sub> SO <sub>4</sub> | 0.05 to -0.15 V <sub>RHE</sub><br>@ 2k cycles                                   | [9]        |
| Co-MoS <sub>2</sub> @CN                                    | 137                                     | 46.5                                | CN                                      | 0.5 M H <sub>2</sub> SO <sub>4</sub> | 24 h @ -10 mA cm <sup>-2</sup>                                                  | [10]       |
| CoS <sub>2</sub> /WS <sub>2</sub>                          | 79                                      | 52                                  | Co <sub>3</sub> O <sub>4</sub> skeleton | 0.5 M H <sub>2</sub> SO <sub>4</sub> | 0 to 0.5 V <sub>RHE</sub> @ 1k cycles<br>50 h @ 100 mA cm <sup>-2</sup>         | [11]       |
| MoO <sub>2</sub> @CoMo                                     | 43                                      | 50                                  | Carbon paper                            | 0.5 M H <sub>2</sub> SO <sub>4</sub> | 10 h @ -50 mA cm <sup>-2</sup>                                                  | [12]       |
| 1T-MoTe <sub>2</sub> /CC                                   | 211                                     | 73                                  | Carbon cloth                            | 1 M H <sub>2</sub> SO <sub>4</sub>   | N/A                                                                             | [13]       |
| Ni@NCW                                                     | 158                                     | 75                                  | Carbonized wood                         | 0.5 M H <sub>2</sub> SO <sub>4</sub> | 3k cycles<br>100 h @ 500 mA cm <sup>-2</sup>                                    | [14]       |
| FeMoS/C/CP                                                 | 140                                     | 57                                  | Carbon paper                            | 0.5 M H <sub>2</sub> SO <sub>4</sub> | 70 h @ -10 mA cm <sup>-2</sup>                                                  | [15]       |
| MoS <sub>2</sub> :C = 1:3                                  | 70                                      | 72                                  | Carbon cloth                            | 0.5 M H <sub>2</sub> SO <sub>4</sub> | 2k cycles                                                                       | [16]       |

**Table S4.** PEMWE performance of HD-Ni<sub>86.7</sub>Mo<sub>3.2</sub>Zn<sub>10.1</sub> and previously reported nonprecious cathodes.

| Membrane electrode assembly (MEA)                              |            |                                              | Temperature<br>/ °C | Current density<br>/ A cm <sup>-2</sup><br><br>@ 2.0 V | Cell<br>Voltage<br>/ V <sub>cell</sub><br><br>@ 1 A cm <sup>-2</sup> | Reference  |
|----------------------------------------------------------------|------------|----------------------------------------------|---------------------|--------------------------------------------------------|----------------------------------------------------------------------|------------|
| Cathode                                                        | Membrane   | Anode                                        |                     |                                                        |                                                                      |            |
| HD-Ni <sub>86.7</sub> Mo <sub>3.2</sub> Zn <sub>10.1</sub> /CP | Nafion 212 | Com. IrO <sub>x</sub> /CP                    | 90                  | 1.897                                                  | 1.817                                                                | This study |
| WMoC NA/CFP                                                    | Nafion 212 | Com. IrO <sub>2</sub> /Pt coated sintered Ti | 80                  | 2.789                                                  | 1.776                                                                | [17]       |
| Cu <sub>44.4</sub> Ni <sub>46</sub> Mo <sub>9.6</sub> /CP      | Nafion 212 | ED-IrO <sub>2</sub> /CP                      | 90                  | 2.528                                                  | 1.791                                                                | [2]        |
| PANI/Ni <sub>2</sub> P/CP                                      | Nafion 117 | IrO <sub>2</sub> /Ti plate                   | 80                  | 2.026                                                  | 1.822                                                                | [18]       |
| NiMo/CF/CP                                                     | Nafion 212 | ED-IrO <sub>2</sub> /CP                      | 90                  | 1.96                                                   | 1.837                                                                | [3]        |
| Ni <sub>96</sub> W <sub>4</sub> /Cu NW                         | Nafion 212 | ED-IrO <sub>2</sub> /CP                      | 90                  | 1.79                                                   | 1.877                                                                | [4]        |
| M-CoSe <sub>1.28</sub> S <sub>0.72</sub> /Ti felt              | Nafion 115 | IrO <sub>2</sub> /Pt coated Ti felt          | 60                  | 1.523                                                  | 1.79                                                                 | [19]       |
| Mo <sub>3</sub> S <sub>13</sub> -NCNT                          | Nafion 212 | IrO <sub>2</sub> /sintered Ti PTL            | 80                  | 1.481                                                  | 1.92                                                                 | [5]        |
| FeP/CP                                                         | Nafion 212 | ED-IrO <sub>2</sub> /CP                      | 90                  | 1.48                                                   | 1.904                                                                | [6]        |
| L-Ni <sub>46</sub> P <sub>54</sub> /CP                         | Nafion 212 | ED-IrO <sub>2</sub> /CP                      | 90                  | 1.47                                                   | 1.936                                                                | [20]       |
| defect-rich 1 T-2 H MoS <sub>2</sub> NS/CFP                    | Nafion 115 | IrRuO <sub>x</sub> /LGDL                     | 90                  | 1.311                                                  | 1.91                                                                 | [7]        |
| WO <sub>2.9</sub> /CP                                          | Nafion 117 | Com. IrO <sub>x</sub> /Ti felt               | 80                  | 1.05                                                   | 1.981                                                                | [8]        |
| 10%Mn-MoS <sub>2</sub> /CP                                     | Nafion 115 | RuO <sub>2</sub> nanoparticles/CP            | 80                  | 0.8                                                    | 2.055                                                                | [9]        |
| WC@NC/CP                                                       | Nafion 212 | IrO <sub>2</sub> /CP                         | 80                  | 0.78                                                   | -                                                                    | [21]       |
| Co-MoS <sub>2</sub> /CP                                        | Nafion 115 | IrO <sub>2</sub> /Ti mesh                    | 80                  | 0.737                                                  | 2.106                                                                | [22]       |
| Cu <sub>93.7</sub> Mo <sub>6.3</sub> /CP                       | Nafion 212 | ED-IrO <sub>2</sub> /CP                      | 90                  | 0.73                                                   | -                                                                    | [10]       |
| Ni <sub>0.64</sub> Co <sub>0.36</sub> OxS <sub>0.28</sub> /CP  | Nafion 212 | ED-IrO <sub>2</sub> /CP                      | 90                  | 0.72                                                   | 2.021                                                                | [11]       |
| MoO <sub>2</sub> @CoMo/CP                                      | Nafion 212 | ED-IrO <sub>2</sub> /CP                      | 90                  | 0.62                                                   | -                                                                    | [12]       |
| MoS <sub>x</sub> /CP                                           | Nafion 212 | ED-IrO <sub>2</sub> /CP                      | 90                  | 0.57                                                   | -                                                                    | [23]       |
| NiP <sub>2</sub> /Ti fiber felt                                | Nafion 115 | IrO <sub>2</sub> /Ti fiber felt              | 80                  | 0.55                                                   | 2.15                                                                 | [24]       |

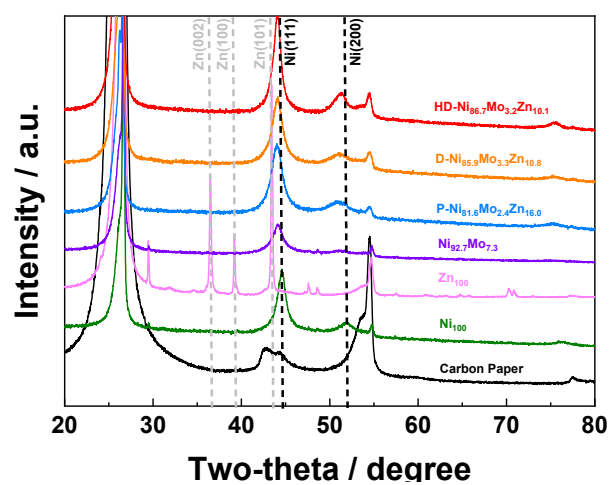

**Figure S1.** XRD patterns of Ni<sub>100</sub>, Zn<sub>100</sub>, Ni<sub>92.7</sub>Mo<sub>7.3</sub>, P-Ni<sub>81.6</sub>Mo<sub>2.4</sub>Zn<sub>16.0</sub>, D-Ni<sub>85.9</sub>Mo<sub>3.3</sub>Zn<sub>10.8</sub>, and HD-Ni<sub>86.7</sub>Mo<sub>3.2</sub>Zn<sub>10.1</sub>.

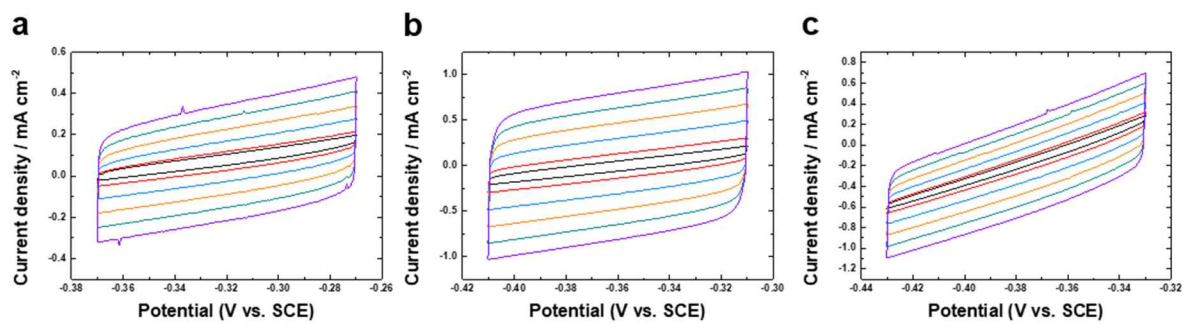

**Figure S2.** Electrochemical double-layer capacitance measurements for (a) P-Ni<sub>81.6</sub>Mo<sub>2.4</sub>Zn<sub>16.0</sub>, (b) D-Ni<sub>85.9</sub>Mo<sub>3.3</sub>Zn<sub>10.8</sub>, and (c) HD-Ni<sub>86.7</sub>Mo<sub>3.2</sub>Zn<sub>10.1</sub>.

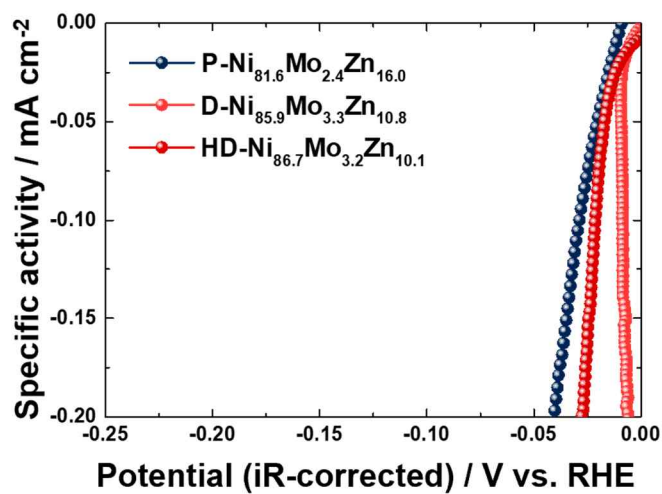

**Figure S3.** Specific activity for P-Ni<sub>81.6</sub>Mo<sub>2.4</sub>Zn<sub>16.0</sub>, D-Ni<sub>85.9</sub>Mo<sub>3.3</sub>Zn<sub>10.8</sub>, and HD-Ni<sub>86.7</sub>Mo<sub>3.2</sub>Zn<sub>10.1</sub>.

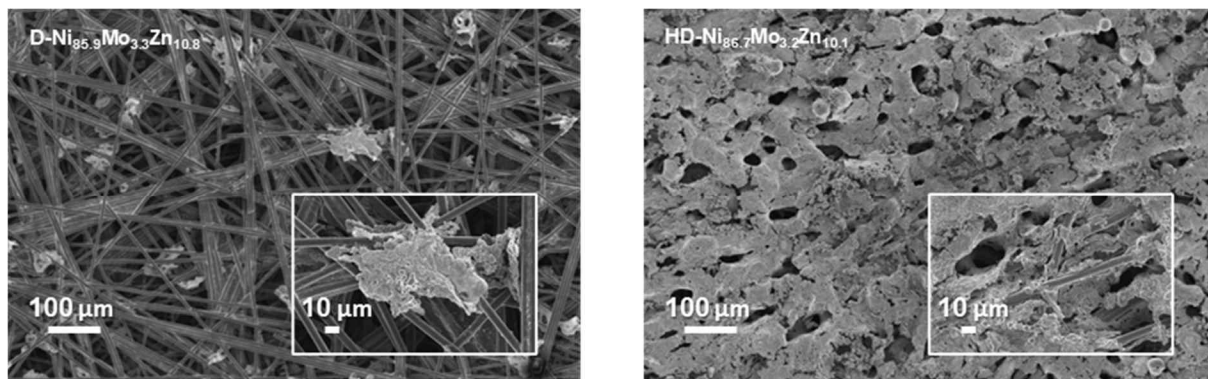

**Figure S4.** Characterization results after 5,000 CV cycles. FE-SEM images of D-Ni<sub>85.9</sub>Mo<sub>3.3</sub>Zn<sub>10.8</sub> and HD-Ni<sub>86.7</sub>Mo<sub>3.2</sub>Zn<sub>10.1</sub>.

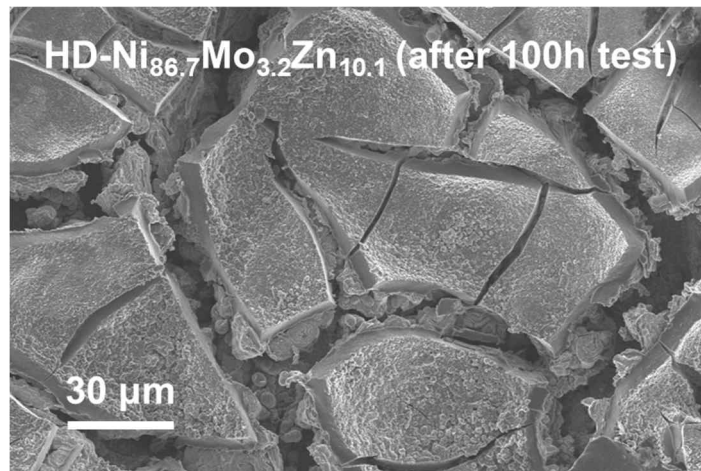

**Figure S5.** FE-SEM image of HD-Ni<sub>86.7</sub>Mo<sub>3.2</sub>Zn<sub>10.1</sub> after the 100 h stability test

## References

1. K.-R. Yeo, H. Kim, K. S. Lee, S. Kim, J. Lee, H. Park and S.-K. Kim, *Applied Catalysis B: Environment and Energy*, 2024, 346, 123738.
2. K. J. Choi, H. Kim and S.-K. Kim, *Journal of Power Sources*, 2021, 506, 230200.
3. X. Zhang, C. Yang, D. Zhou, D. Zhang, J. Zhang, and Z. Wang, *Journal of Alloys and Compounds*, 2025, 1051, 185708.
4. Y. Park and D.-H. Ha, *International Journal of Hydrogen Energy*, 2025, 136, 392-401.
5. P. K. Holzapfel, M. Buehler, D. Escalera-López, M. Bierling, F. D. Speck, K. J. Mayrhofer, S. Cherevko, C. V. Pham and S. Thiele, *Small*, 2020, 16, 2003161.
6. Y. Park, H. Kim, T. Lee, Y.-K. Hong, W. Jeong, S.-K. Kim and D.-H. Ha, *Chemical Engineering Journal*, 2022, 431, 133217.
7. Z. Xie, S. Yu, X. Ma, K. Li, L. Ding, W. Wang, D. A. Cullen, H. M. Meyer III, H. Yu and J. Tong, *Applied Catalysis B: Environmental*, 2022, 313, 121458.
8. M. R. Qu, Y. R. Cheng, H. L. Duan, Y. Y. Qin, S. H. Feng, X. Z. Su, Y. F. Yuan, W. S. Yan, L. Cao and J. Xu, *Small*, 2024, 20, 2401159.
9. M. Rafei, A. Piñeiro-García, X. Wu, D. K. Perivoliotis, T. Wågberg and E. Gracia-Espino, *Materials Today Energy*, 2024, 41, 101524.
10. Z. Huang, J. Li, S. Guo, J. Liu, J. Zeng, and F. Yuan, *Separation and Purification Technology*, 2025, 354, 129011.
11. C. Yao, Q. Wang, C. Peng, R. Wang, J. Liu, N. Tsidaeva, and W. Wang, *Chemical Engineering Journal*, 2024, 479, 147924.
12. G. H. Han, H. Kim, J. Kim, J. Kim, S. Y. Kim and S. H. Ahn, *Applied Catalysis B: Environmental*, 2020, 270, 118895.
13. A. Kumar Samuel, A. H. Faqeeh, W. Li, Z. Ertekin, Y. Wang, J. Zhang, N. Gadegaard, D. A. Moran, M. D. Symes and A. Y. Ganin, *ACS Sustainable Chemistry & Engineering*, 2024, 12, 1276-1285.
14. D. Li, H. Cheng, X. Hao, G. Yu, C. Qiu, Y. Xiao and B. Zhang, *Advanced Materials*, 2024, 36(4), 2304917.
15. A. Morozan, H. Johnson, C. Roiron, G. Genay, D. Aldakov, A. Ghedjatti, C. T. Nguyen, P. D. Tran, S. Kinge and V. Artero, *Acs Catalysis*, 2020, 10, 14336-14348.
16. J. Li, R. Miró, A. Wrzesińska-Lashkova, J. Yu, J. Arbiol, Y. Vaynzof, A. Shavel and V. Lesnyak, *Advanced Functional Materials*, 2024, 34, 2404565.
17. L. Shen, Y. Shi, T. O. Ogundipe, K. Huang, S. Cao, Z. Lu, Z. Wang, H. Tan and C. Yan, *Journal of Power Sources*, 2022, 538, 231557.
18. H. Shi, J. Qian and X. Hu, *Journal of Power Sources*, 2024, 596, 234099.
19. X.-L. Zhang, P.-C. Yu, X.-Z. Su, S.-J. Hu, L. Shi, Y.-H. Wang, P.-P. Yang, F.-Y. Gao, Z.-Z. Wu and L.-P. Chi, *Science Advances*, 2023, 9, eadh2885.
20. J. Kim, J. Kim, H. Kim and S. H. Ahn, *ACS Applied Materials & Interfaces*, 2019, 11, 30774-30785.
21. Q. Feng, Y. Xiong, L. Xie, Z. Zhang, X. Lu, Y. Wang, X.-Z. Yuan, J. Fan, H. Li and H. Wang, *ACS Applied Materials & Interfaces*, 2019, 11, 25123-25132.
22. J. Mo, S. Wu, T. Lau, R. Kato, K. Suenaga, T.-S. Wu, Y.-L. Soo, J. Foord and S. Tsang, *Materials Today Advances*, 2020, 6, 100020.
23. J. H. Kim, H. Kim, J. Kim, H. J. Lee, J. H. Jang and S. H. Ahn, *Journal of Power Sources*, 2018, 392, 69-78.
24. C. Hu, F. Ding, C. Lv, L. Zhou, N. Zeng, A. Liu, J. Cai and T. Tang, *Separation and Purification Technology*, 2025, 352, 128249.
